# Supplementary material for: Narrow-band Rb1−yKyNa3(Li3SiO4)4:Eu2+(0 ≤ y ≤ 1) cyan-blue phosphors for full-spectrum white LEDs
Source: Royal Society of Chemistry journal article supplement (doi:10.1039/d2dt01896a), 2022-01-01
Supplement: d2dt01896a1.pdf [file d2dt01896a1.pdf]

## Supplementary Information

### Narrow-band $\text{Rb}_{1-y}\text{K}_y\text{Na}_3(\text{Li}_3\text{SiO}_4)_4$ : $\text{Eu}^{2+}$ ( $0 \leq y \leq 1$ ) cyan-blue phosphor for full-spectrum white LEDs

Jun Sun,<sup>a</sup> Minghui Zhou,<sup>a</sup> Bei Zhang,<sup>a</sup> Youjie Hua,<sup>\*a,c</sup> Feifei Huang,<sup>a,c</sup> Hongping Ma,<sup>b</sup> Renguang Ye<sup>a,c</sup>  
and Shiqing Xu<sup>\*a,c</sup>

a. College of Optical and Electronic Technology, China Jiliang University, Hangzhou 310018, China.

b. School of Mechanical and Energy Engineering, Zhejiang University of Science and Technology, Hangzhou 310023, China.

c. Key Laboratory of Rare Earth Optoelectronic Materials and Devices of Zhejiang Province, China Jiliang University, Hangzhou 310018, China.

#### Corresponding Author

E-mail: [huayoujie@163.com](mailto:huayoujie@163.com), [shiqingxu@cjlu.edu.cn](mailto:shiqingxu@cjlu.edu.cn)

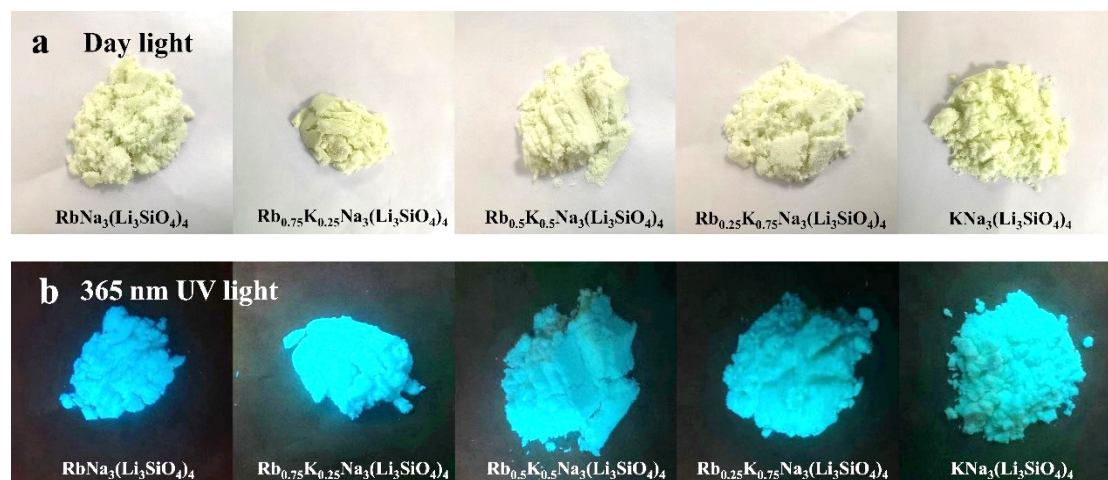

**Fig. S1** **a** Physical image of  $\text{Rb}_{1-y}\text{K}_y\text{Na}_3(\text{Li}_3\text{SiO}_4)_4$ :  $0.08\text{Eu}^{2+}$  ( $y=0, 0.25, 0.5, 0.75, 1$ ) sample under sunlight. **b**  $\text{Rb}_{1-y}\text{K}_y\text{Na}_3(\text{Li}_3\text{SiO}_4)_4$ :  $0.08\text{Eu}^{2+}$  ( $y=0, 0.25, 0.5, 0.75, 1$ ) sample under 365 nm UV light.
